---

1 **The interplay between host genetics and the gut microbiome reveals common**  
2 **and distinct microbiome features for human complex diseases**

3 Fengzhe Xu<sup>1#</sup>, Yuanqing Fu<sup>1#</sup>, Ting-yu Sun<sup>2</sup>, Zengliang Jiang<sup>1,3</sup>, Zelei Miao<sup>1</sup>, Menglei  
4 Shuai<sup>1</sup>, Wanglong Gou<sup>1</sup>, Chu-wen Ling<sup>2</sup>, Jian Yang<sup>4,5</sup>, Jun Wang<sup>6\*</sup>, Yu-ming Chen<sup>2\*</sup>,  
5 Ju-Sheng Zheng<sup>1,3,7\*</sup>

6 <sup>#</sup>These authors contributed equally to the work

7 <sup>1</sup> School of Life Sciences, Westlake University, Hangzhou, China.

8 <sup>2</sup> Guangdong Provincial Key Laboratory of Food, Nutrition and Health; Department  
9 of Epidemiology, School of Public Health, Sun Yat-sen University, Guangzhou,  
10 China.

11 <sup>3</sup> Institute of Basic Medical Sciences, Westlake Institute for Advanced Study,  
12 Hangzhou, China.

13 <sup>4</sup> Institute for Molecular Bioscience, The University of Queensland, Brisbane, QLD,  
14 Australia.

15 <sup>5</sup> Institute for Advanced Research, Wenzhou Medical University, Wenzhou, Zhejiang  
16 325027, China

17 <sup>6</sup> CAS Key Laboratory for Pathogenic Microbiology and Immunology, Institute of  
18 Microbiology, Chinese Academy of Sciences, Beijing, China.

19 <sup>7</sup> MRC Epidemiology Unit, University of Cambridge, Cambridge, UK.

20

21 Short title: Interplay between and host genetics and gut microbiome

22

---

23 \*Correspondence to

24 Prof Ju-Sheng Zheng

25 School of Life Sciences, Westlake University, 18 Shilongshan Rd, Cloud Town,

26 Hangzhou, China. Tel: +86 (0)57186915303. Email: zhengjusheng@westlake.edu.cn

27 And

28 Prof Yu-Ming Chen

29 Guangdong Provincial Key Laboratory of Food, Nutrition and Health; Department of

30 Epidemiology, School of Public Health, Sun Yat-sen University, Guangzhou, China.

31 Email: chenyum@mail.sysu.edu.cn

32 And

33 Prof Jun Wang

34 CAS Key Laboratory for Pathogenic Microbiology and Immunology, Institute of

35 Microbiology, Chinese Academy of Sciences, Beijing, China.

36 Email: junwang@im.ac.cn

37

---

38 *Abstract*

39 There is increasing interest about the interplay between host genetics and gut  
40 microbiome on human complex diseases, with prior evidence mainly derived from  
41 animal models. In addition, the shared and distinct microbiome features among  
42 human complex diseases remain largely unclear. We performed a microbiome  
43 genome-wide association study to identify host genetic variants associated with gut  
44 microbiome in a Chinese population with 1475 participants. We then conducted  
45 bi-directional Mendelian randomization analyses to examine the potential causal  
46 associations between gut microbiome and human complex diseases. We did not find  
47 evidence supporting the causal effect of gut microbiome on human complex diseases.  
48 In contrast, atrial fibrillation, chronic kidney disease and prostate cancer, as predicted  
49 by the host genetics, had potential causal effect on gut microbiome. Further  
50 disease-microbiome feature analysis suggested that gut microbiome features revealed  
51 novel relationship among human complex diseases. These results suggest that  
52 different human complex diseases share common and distinct gut microbiome  
53 features, which may help re-shape our understanding about the disease etiology in  
54 humans.

55

---

56 **Introduction**

57 Ever-increasing evidence has suggested that gut microbiome is involved in many  
58 physiological processes, such as energy harvest, immune response, and neurological  
59 function<sup>1-3</sup>. With successes of investigation into the clinical application of fecal  
60 transplants, modulation of gut microbiome has emerged as a potential treatment  
61 option for some complex diseases, including inflammatory bowel disease and  
62 colorectal cancer<sup>4,5</sup>. However, it is still unclear whether the gut microbiome has the  
63 potential to be clinically applied for the prevention or treatment of many other  
64 complex diseases. Therefore, it is important to clarify the bi-directional causal  
65 association between gut microbiome and human complex diseases or traits.

66

67 Mendelian randomization (MR) is a method that uses genetic variants as instrumental  
68 variables to investigate the causality between an exposure and outcome in  
69 observational studies<sup>6</sup>. Prior literature provides evidence that the composition or  
70 structure of the gut microbiome can be influenced by the host genetics<sup>7-10</sup>. On the  
71 other hand, host genetic variants associated with gut microbiome were rarely explored  
72 in Asian populations, thus we are still lacking instrument variables to perform MR for  
73 gut microbiome in Asians. This calls for novel microbiome genome-wide association  
74 study (GWAS) in Asian populations.

75

76 Along with the causality issue between the gut microbiome and human complex  
77 diseases, it is so far unclear whether human complex diseases had similar or unique

---

78 gut microbiome features. Identifying common and distinct gut microbiome features  
79 across different diseases might shed light on novel relationships among the complex  
80 diseases and update our understanding about the disease etiology in humans. However,  
81 the composition and structure of gut microbiome are influenced by a variety of factors  
82 including environment, diet and regional variation<sup>11-13</sup>, which posed a key challenge  
83 for the description of representative microbiome features for a specific disease.  
84 Although there were several studies comparing disease-related gut microbiome<sup>14-16</sup>,  
85 few of them has examined and compared the microbiome features across different  
86 human complex diseases.

87

88 In the present study, we performed a microbiome GWAS in a Chinese cohort study:  
89 the Guangzhou Nutrition and Health Study (GNHS)<sup>17</sup>, including 1475 participants.  
90 Subsequently, we applied a bi-directional MR method to explore the genetically  
91 predicted relationship between gut microbiome and human complex diseases. To  
92 explore novel relationships among human complex diseases based on gut microbiome,  
93 we investigated the shared and distinct gut microbiome features across diverse human  
94 complex diseases<sup>18</sup>.

95

## 96 **Result**

### 97 **Overview of the study**

98 Our study was based on the GNHS, with 4048 participants (40-75 years old) living in  
99 urban Guangzhou city recruited during 2008 and 2013<sup>17</sup>. In the GNHS, stool samples

---

100 were collected among 1937 participants during follow-up visits, among which 1475  
101 unrelated participants without taking anti-biotics were included in our discovery  
102 microbiome GWAS. We then included additional 199 participants with both genetic  
103 and gut microbiome data as a replication cohort, which belonged to the control arm of  
104 a case-control study of hip fracture in Guangdong Province, China <sup>19</sup>.

105

106 For both discovery and replication cohorts, genotyping was carried out with Illumina  
107 ASA-750K arrays. Quality control and relatedness filters were performed by  
108 PLINK1.9 <sup>20</sup>. We conducted the genome-wide genotype imputation with 1000  
109 Genomes Phase3 v5 reference panel by Minimac3<sup>21-23</sup>. HLA region was imputed with  
110 Pan-Asian reference panel and SNP2HLA v1.0.3 <sup>24-26</sup>.

111

### 112 **Association of host genetics with gut microbiome features**

113 We performed a series of microbiome GWAS with PLINK 1.9 based on logistic  
114 models for binary variables <sup>20</sup>. For continuous variables, we used GCTA with mixed  
115 linear model-based association (MLMA) method <sup>27,28</sup>. We also analyzed categorical  
116 variable enterotypes of the participants based on genus-level relative abundance of gut  
117 microbiome, using the Jensen-Shannon Distance (JSD) and the Partitioning Around  
118 Medoids (PAM) clustering algorithm <sup>29</sup>. The participants were subsequently clustered  
119 into two groups according to the enterotypes (*Prevotella* vs *Bacteroides*). Thereafter,  
120 we performed GWAS for enterotypes using logistic regression model to explore  
121 potential associations between host genetics and enterotypes. However, we did not

---

122 find any genome-wide significant locus with  $p < 5 \times 10^{-8}$ . Furthermore, we used a  
123 restricted maximum likelihood analysis (REML) with GCTA to estimate the  
124 SNP-based heritability, and the estimate heritability of the enterotype was 0.055  
125 (SE=0.19, Supplementary Table S2)<sup>30</sup>.  
126  
127 To examine the association of host genetic variants with alpha diversity, we performed  
128 GWAS for three indices (Shannon diversity index, Chao1 diversity indices and  
129 observed OTUs index), but again no genome-wide significant signal ( $p < 5 \times 10^{-8}$ ) was  
130 found. In the discovery cohort, the heritability of alpha diversity ranged from 0.054 to  
131 0.14 (SE=0.20 for all indices, Supplementary Table S2). To further investigate if there  
132 is host genetic basis underlying alpha diversity, we constructed a polygenic score for  
133 each alpha diversity indicator in the replication cohort, using the genetic variants  
134 which showed suggestive significance ( $p < 5 \times 10^{-5}$ ) in the discovery GWAS. The  
135 polygenic score was not significantly associated with its corresponding alpha diversity  
136 index in our replication cohort. Meanwhile, none of the associations with alpha  
137 diversity indices reported in the literature could be replicated (Supplementary Table  
138 S7)<sup>7</sup>.  
139  
140 We performed a beta diversity GWAS using a tool called MicrobiomeGWAS<sup>31</sup>, and  
141 found that one locus at *SMARCA2* gene (rs6475456) was associated with  
142 beta-diversity at a genome-wide significance level ( $p = 3.96 \times 10^{-9}$ ). However, we could  
143 not replicate the results in the replication cohort, which may be due to the limited

---

144 sample size of the replication cohort. In addition, prior literature had reported 73  
145 genetic variants that were associated with beta diversity <sup>8,13,32,33</sup>, among which we  
146 found that 3 single nucleotide polymorphisms (SNP, *UHRF2* gene-rs563779, *LHFPL3*  
147 gene-rs12705241, *CTD-2135J3.4*-rs11986935) had nominal significant ( $p < 0.05$ )  
148 association with beta-diversity in our cohort (Supplementary Table S6), although none  
149 of the association survived Bonferroni correction. These studies used various methods  
150 for the sequencing and calculation of beta diversity, which raised challenges to verify  
151 and extrapolate results across populations.

152

153 We then took the genetic loci reported to be associated with individual taxa in prior  
154 studies <sup>7,8,13,33</sup> for replication in our GNHS dataset. Although there are still some  
155 signals with nominal significance ( $p < 0.05$ ) in our study (e.g., 7 loci associated with  
156 *Lachnospiraceae*, *Coprococcus* or *Bacteroides* with  $p < 0.05$ ; Supplementary Table S5),  
157 none of the associations of these genetic variants with taxa survived the Bonferroni  
158 correction ( $p < 1 \times 10^{-4}$ ). The null results may be because of various clustering  
159 similarities, classifiers or reference databases to annotate taxa and different  
160 sequencing methods used in these studies.

161

162 We subsequently performed GWAS discovery for individual gut microbes in our own  
163 GNHS discovery dataset. For the taxa present at more than ninety percent of  
164 participants and alpha diversity, we used Z-score normalization to transform the  
165 distribution and carried out analysis based on a log-normal model. A MLMA test in



---

166 the GCTA was used to assess the association, with the first five principal components,  
167 age, sex and sequencing batch fitted as fixed effects and the effects of all the SNPs  
168 fitted as random effects<sup>27,28,34</sup>. For other taxa present at fewer than ninety percent, we  
169 transformed the absence/presence of the taxon into binary variables and used  
170 PLINK1.9 to perform a logistic model, adjusted for the first five principal components,  
171 age, sex and sequencing batch.

172

173 For all the gut microbiome taxa, the significant threshold was defined as  $5 \times 10^{-8}$  in the  
174 discovery stage. As some taxa were correlated with each other, we also used an  
175 eigendecomposition analysis to calculate the effective number of independent taxa on  
176 each taxonomy level (phylum level: 2.3, class level: 2.9, order level: 2.9, family level:  
177 5.5, genus level: 5.6, species level: 3.2)<sup>35,36</sup>. We found that 6 taxa were associated  
178 with host genetic variants in the discovery cohort ( $p < 5 \times 10^{-8}/n$ ,  $n$  is the effective  
179 number of independent taxa on each taxonomy level, Supplementary Table S4);  
180 however, these associations were not significant ( $p > 0.05$ ) in the replication cohort. We  
181 then used a threshold of  $p < 5 \times 10^{-5}$  at the GWAS discovery stage to incorporate  
182 additional genetic variants which may explain a larger proportion of heritability for  
183 taxa, based on which we constructed a polygenic score for each taxon in the  
184 replication. We found that the polygenic scores were significantly associated with 3  
185 taxa including *Coriobacteriaceae*, *Odoribacter* and *Parabacteroides\_undefined* in the  
186 replication set ( $p < 0.05$ , Methods, see also Figure 1A, 1B, 1C).

187

---

188 **Genetic correlation of gut microbiome and traits**

189 We used GCTA to perform a bivariate GREML (genomic-relatedness-based restricted  
190 maximum-likelihood) analysis to estimate the genetic correlation between gut  
191 microbiome and traits in the GNHS <sup>27,37</sup>. The traits included BMI, fasting blood sugar  
192 (FBS), glycosylated hemoglobin (HbA1c), systolic blood pressure (SBP), diastolic  
193 blood pressure (DBP), high density lipoprotein cholesterol (HDL-C), low density  
194 lipoprotein cholesterol (LDL-C), total cholesterol (TC) and triglyceride (TG), none of  
195 which could pass Bonferroni correction. Additionally, HDL-C was the only trait that  
196 had nominal genetic correlation ( $p < 0.05$ ) with gut microbes (specifically,  
197 *Desulfovibrionaceae* and [*Prevotella*], Supplementary Table S3).

198

199 **Bi-directional assessment of the genetically predicted association between gut**  
200 **microbiome and complex diseases/traits**

201 Using genetic variants-composed polygenic scores as genetic instruments, we  
202 performed MR analysis to assess the putative causal effect of microbiome  
203 (*Coriobacteriaceae*, *Odoribacter* and *Parabacteroides\_undefined*) on human complex  
204 diseases or traits. Inverse variance weighted (IVW) method was used for the MR  
205 analysis, while other three methods (Weighted median, MR-Egger and MR-PRESSO)  
206 <sup>38,39</sup> were applied to confirm the robustness of results. The horizontal pleiotropy was  
207 assessed using MR-PRESSO Global test and MR-Egger Regression. For the analysis  
208 of gut microbiome on complex traits, we downloaded public available GWAS  
209 summary statistics of complex traits (n=58) and diseases (type 2 diabetes mellitus

---

210 (T2DM), atrial fibrillation (AF), colorectal cancer (CRC) and prostatic cancer (PCa))  
211 reported by BioBank Japan<sup>40-44</sup>. There was no evidence that these taxa had causal  
212 association with human complex diseases or traits in our MR analyses  
213 (Supplementary Table S9), which may be due to the limited genetic instruments  
214 discovered in our present study.

215

216 We subsequently performed a reserve MR analysis to assess the potential causal effect  
217 of human complex diseases on gut microbiome features. For the reserve MR analyses,  
218 the diseases of interests included T2DM, AF, coronary artery disease (CAD), chronic  
219 kidney disease (CKD), Alzheimer's disease (AD), CRC and PCa, and their  
220 instrumental variables for the MR analysis were based on the previous large-scale  
221 GWAS in East Asians<sup>40,45-50</sup>. The results suggested that AF and CKD were causally  
222 associated with gut microbiome (See also Figure 2A, 2B, Supplementary Table S10).  
223 Genetically predicted higher risk of AF was associated with lower abundance of  
224 *Coprophilus*, *Lachnobacterium*, *Barnesiellaceae*, *Veillonellaceae* and *Mitsuokella*,  
225 and higher abundance of *Alcaligenaceae*. Additionally, genetically predicted higher  
226 risk of CKD could increase *Anaerostipes* abundance and higher risk of PCa could  
227 decrease [*Prevotella*].

228

229 To further investigate the potential complex diseases that may be correlated with the  
230 taxa affected by AF, we applied Phylogenetic Investigation of Communities by  
231 Reconstruction of Unobserved States (PICRUSt) to predict the disease pathway

---

232 abundance<sup>51</sup>. We used Spearman's rank-order correlation to test whether 22 human  
233 complex diseases were associated with the aforementioned AF-associated taxa (See  
234 also Figure 2C). The heatmap indicated that cancers and neurodegenerative diseases  
235 including Parkinson's disease (PD), AD, amyotrophic lateral sclerosis (ALS) as well  
236 as AF were correlated with similar gut microbiome. Although the association among  
237 these diseases are highly supported by previous studies<sup>52-54</sup>, no study has compared  
238 common gut microbiome features across these different diseases.

239

#### 240 **Microbiome features of human complex diseases**

241 To compare gut microbiome features across human diseases, we chose 22 human  
242 complex diseases from predicted abundance and performed k-medoids clustering<sup>18</sup>.  
243 We used an  $m \times n$  matrix to perform the cluster analysis, where  $m$  is the number of  
244 participants and  $n$  is the number of selected diseases. According to optimum average  
245 silhouette width<sup>55</sup>, we chose optimal number of clusters for further analysis (See also  
246 Figure 3A). The plot showed that neurological diseases including ALS and AD  
247 belonged to the same cluster, while PD and CRC had much similarity in gut  
248 microbiome. The results also suggested that systemic lupus erythematosus (SLE) and  
249 chronic myeloid leukemia (CML) shared similar gut microbiome features. Moreover,  
250 we could replicate these clusters in our replication cohort, which suggested that the  
251 clustering results were robust (See also Figure 3B).

252

253 We further asked whether gut microbiome contributed to the novel clustering. To this

---

254 end, we repeated the analysis among participants who took antibiotic less than two  
255 weeks before stool sample collection, considering that antibiotic treatments were  
256 believed to cause microbiome imbalance, and the clusters were totally different in this  
257 group (See also Figure 3C). The results indicated a totally different clustering, which  
258 suggested that gut microbiome indeed contributed to the correlations among diseases.  
259 To further demonstrate common microbiome features across different diseases, we  
260 examined the correlation of the predicted diseases with genus-level taxa. The results  
261 showed that human complex diseases had shared similar gut microbiome features, as  
262 well as distinct features on their own (See also Figure 4).

263

264 To validate the accuracy of the association between the predicted disease-related gut  
265 microbiome features and the corresponding disease, we used T2DM as an example,  
266 examining the association of predicted T2DM-related microbiome features with  
267 T2DM risk in our GNHS samples. We constructed a microbiome risk score (MRS)  
268 based on 16 selected taxa with predicted correlation coefficient with T2DM greater  
269 than 0.2. A logistic regression was used to examine the above MRS with T2DM risk  
270 in the GNHS (n=1886, with 217 T2DM cases). The results showed that higher MRS  
271 was associated with lower risk of T2DM (odds ratio: 0.850, 95% confidence interval:  
272 0.804 to 0.898,  $p=8.75 \times 10^{-9}$ ).

273

274 Based on the above results, we proposed a hypothesis that related diseases might  
275 share similar gut microbiome features. To test for this hypothesis, we performed

---

276 validation analysis by including GNHS participants who had one of the following  
277 self-reported diseases: stroke (n=8), chronic hepatitis (n=19), coronary heart diseases  
278 (CHD) (n=40), cataract (n=124) and insomnia (n=68). The results of k-medoids  
279 clustering suggested that CHD, cataract and insomnia shared common gut  
280 microbiome features, which was supported by the prior research reporting that both  
281 patients suffering insomnia and women receiving cataract extraction had increased  
282 risks of CHD <sup>56-58</sup>.

283

## 284 **Discussion**

285 Our study is among the first to investigate the host genetics-gut microbiome  
286 association in East Asian populations and reveals that several microbiome species  
287 (e.g., *Coriobacteriaceae* and *Odoribacter*) are influenced by host genetics. We then  
288 show that complex diseases such as atrial fibrillation, chronic kidney disease and  
289 prostate cancer, have potential causal effect on gut microbiome. More interestingly,  
290 our results indicate that different human complex diseases may be mechanically  
291 correlated by sharing common gut microbiome features, but also maintaining their  
292 own distinct microbiome features.

293

294 Previous studies and our study showed that gut microbiome had an inclination to be  
295 influenced by host genetics <sup>8,10,33,59</sup>, although the successful replication tends to be  
296 rare. We could not validate any of the reported genetic variants that were significantly  
297 associated with gut microbiome features in prior reports, which may reflect the

---

298 difference in population and heterogeneity between study but also raise concerns  
299 about the reproducibility. Many factors including ethnic differences,  
300 gene-environment interaction and dissimilarity in sequencing methods may make it  
301 hard to extrapolate results from microbiome GWAS across populations in the  
302 microbiome field. Nevertheless, we successfully replicate several polygenic scores of  
303 gut microbiome, and the current study represent the largest dataset in Asian  
304 populations and would be a unique resource to be used in large-scale trans-ethnic  
305 meta-analysis of microbiome GWAS in future.

306

307 The MR analysis in the present study did not support causal effect of gut microbiome  
308 on diseases or traits, however, this result should be interpreted with caution because of  
309 the limited genetic instruments derived from GWAS. In contrast, the reverse MR  
310 analysis provided evidence that AF, CKD and PCa could causally influence gut  
311 microbiome. As our study is among the first to investigate gene-microbiome  
312 association in East Asians, we need further study in this region to confirm our results.  
313 Additionally, rare and low-frequency variants may have an important impact on  
314 common diseases<sup>60</sup>, thus it will be of interest to clarify the effects of low-frequency  
315 variants on gut microbiome in cohorts with large sample sizes in future.

316

317 Our results indicate that gut microbiome helps reveal novel and interesting  
318 relationships among human complex diseases, suggesting that different diseases may  
319 have common and distinct gut microbiome features. A prior study including

---

320 participants from different countries identified three microbiome clusters<sup>29</sup>. Notably,  
321 this study focused on classifying the individuals into distinct enterotypes regardless of  
322 the individuals' health status, while in the present study we described representative  
323 microbiome features for diseases of interest. The microbiome features revealed a  
324 close association of AF with neurodegenerative diseases as well as cancers, which  
325 was supported by prior studies showing that AF had correlation with AD and PD<sup>52,53</sup>,  
326 and AF patients had relatively higher risks of several cancers including lung cancer  
327 and CRC<sup>54,61</sup>. We also observed that microbiome features of SLE and CML were  
328 highly similar. Interestingly, a tyrosine kinase inhibitor of platelet-derived growth  
329 factor receptor, imatinib, was widely used to treat CML and significantly ameliorated  
330 survival in murine lupus autoimmune disease<sup>62</sup>. In addition, association between CRC  
331 and PD has been reported in several observational cohorts<sup>63,64</sup>. Collectively, these  
332 findings strongly support our hypothesis that human complex diseases sharing similar  
333 microbiome features might be mechanically correlated. Furthermore, from the  
334 perspectives of risk genes of AF and neurodegenerative diseases, previous GWAS for  
335 AF have identified two loci at *PITX2* gene-rs6843082 and *C9orf3* gene-rs7026071,  
336 which were also associated with the risk of ALS (p=0.0138 and p=0.049, respectively)  
337 <sup>65-67</sup>.

338

339 In summary, we perform bi-directional MR analyses to examine the causal  
340 relationship between gut microbiome and human complex diseases, revealing that  
341 some complex diseases causally affect abundance of specific gut microbes. There is



---

342 no convincing evidence supporting the causal role of gut microbiome on human  
343 complex diseases. The disease and gut microbiome association analysis reveals novel  
344 relationships among human complex diseases, which may help re-shape our  
345 understanding about the disease etiology, as well as extending clinical indications of  
346 existing drugs for different diseases.

347

## 348 **Method**

### 349 **Study participants and sample collection**

350 Our study was based on the Guangzhou Nutrition and Health Study (GNHS), with  
351 4048 participants (40-75 years old) living in urban Guangzhou city recruited during  
352 2008 and 2013 <sup>17</sup>. We followed up participants every three years. In the GNHS, stool  
353 samples were collected among 1937 participants during follow-up visits. Among  
354 those with stool samples, 1717 participants had genetic data and 1475 participants  
355 with identical by decent (IBD) less than 0.185.

356

357 We included 199 participants with both genetic and gut microbiome data as a  
358 replication cohort, which belonged to the control arm of a case-control study of hip  
359 fracture with the participants (52-83 years old) recruited between June 2009 and  
360 August 2015 in Guangdong Province, China <sup>19</sup>.

361

362 Blood samples of all participants were collected after an overnight fasting and buffy  
363 coat was separated from whole blood and stored at -80°C. Stool samples were

---

364 collected during the on-site visit of the participants at Sun Yat-sen University. All  
365 samples were manually stirred, separated into tubes and stored at  $-80^{\circ}\text{C}$  within four  
366 hours.

367

### 368 **Genotyping data**

369 For both discovery and replication cohorts, DNA was extracted from leukocyte using  
370 the TIANamp® Blood DNA Kit as per the manufacturer's instruction. DNA  
371 concentrations were determined using the Qubit quantification system (Thermo  
372 Scientific, Wilmington, DE, US). Extracted DNA was stored at  $-80^{\circ}\text{C}$ . Genotyping  
373 was carried out with Illumina ASA-750K arrays. Quality control and relatedness  
374 filters were performed by PLINK1.9<sup>20</sup>. Individuals with high or low proportion of  
375 heterozygous genotypes (outliers defined as 3 standard deviation) were excluded<sup>68</sup>.  
376 Individuals who had different ancestries (the first two principal components  $\pm 5$   
377 standard deviation from the mean) or related individuals ( $\text{IBD} > 0.185$ ) were  
378 excluded<sup>68</sup>. Variants were mapping to the 1000 Genomes Phase3 v5 by SHAPEIT<sup>23,69</sup>  
379 and then we conducted the genome-wide genotype imputation with 1000 Genomes  
380 Phase3 v5 reference panel by Minimac3<sup>21,22</sup>. Genetic variants with imputation  
381 accuracy  $\text{RSQR} > 0.3$  and  $\text{MAF} > 0.05$  were included in our analysis. We used  
382 Pan-Asian reference panel consist of 502 participants and SNP2HLA v1.0.3 to impute  
383 HLA region<sup>24-26</sup>.

384

### 385 **Sequencing and processing of 16S rRNA data**

---

386 Microbial DNA was extracted from fecal samples using the QIAamp® DNA Stool  
387 Mini Kit per the manufacturer's instruction. DNA concentrations were determined  
388 using the Qubit quantification system. The V3-V4 region of the 16S rRNA gene was  
389 amplified from genomic DNA using primers 341F and 805R. Sequencing was  
390 performed using MiSeq Reagent Kits v2 on the Illumina MiSeq System.  
391  
392 Fastq-files were demultiplexed by the MiSeq Controller Software. Ultra-fast sequence  
393 analysis (USEARCH) was performed to trim the sequence for amplification primers,  
394 diversity spacers, sequencing adapters, merge-paired and quality filter<sup>70</sup>. Operational  
395 taxonomic units (OTUs) were clustered based on 97% similarity using UPARSE<sup>71</sup>.  
396 OTUs were annotated with Greengenes 13\_8  
397 (<https://greengenes.secondgenome.com/>). After randomly selecting 10000 reads for  
398 each sample, Quantitative Insights into Microbial Ecology (QIIME) software version  
399 1.9.0 was used to calculate alpha diversity (Shannon diversity index, Chao1 diversity  
400 indices and observed OTUs index) based on the rarefied OTU counts<sup>72</sup>.

401

## 402 **Statistical analysis**

### 403 **Genome-wide association analysis of gut microbiome features**

404 For each of the GNHS participants and the replication cohort, we clustered  
405 participants based on genus-level relative abundance, estimating the JSD distance and  
406 PAM clustering algorithm, and then defined two enterotypes according to  
407 Calinski-Harabasz Index<sup>29,73</sup>. PLINK 1.9 was used to perform a logistic regression

---

408 model for enterotypes and taxa present at fewer than ninety percent, adjusted for age,  
409 sex and the first five principal components.

410

411 For beta diversity, the analyses for the genome-wide host genetic variants with beta  
412 diversity was performed using MicrobiomeGWAS<sup>31</sup>, adjusted for covariates including  
413 the first five principal components, age and sex. We filtered OTUs present at fewer  
414 than ten percent of participants to calculate Bray–Curtis dissimilarity.

415

416 Alpha diversity was calculated after randomly sampling 10000 reads per sample. For  
417 the taxa present at more than ninety percent of participants and alpha diversity, we  
418 used Z-score normalization to transform the distribution and carried out analysis  
419 based on a log-normal model. A mixed linear model based association (MLMA) test  
420 in GCTA was used to assess the association, fitting the first five principal components,  
421 age, sex and sequencing batch as fixed effects and the effects of all the SNPs as  
422 random effects<sup>27,28,34</sup>. For other taxa present at fewer than ninety percent, we  
423 transformed the absence/presence of the taxon into binary variables and used  
424 PLINK1.9 to perform a logistic model, adjusted for the first five principal components,  
425 age, sex and sequencing batch. For all the gut microbiome features, the significant  
426 threshold was defined as  $5 \times 10^{-8} / n$  ( $n$  is the effective number of independent taxa on  
427 each taxonomy level) in the discovery stage. We estimated genomic inflation factors  
428 with LDSC v1.0.1 at local server<sup>74</sup>.

429

---

430 **Proportion of variance explained by all SNPs**

431 We used the GREML method in GCTA to estimate the proportion of variance  
432 explained by all SNPs<sup>30</sup>. The taxa were divided into two groups based on whether the  
433 taxa were present in the ninety percent of participants or not. For alpha diversity and  
434 taxa, our model was adjusted for constrain covariates including sex and sequencing  
435 batch, as well as quantitative covariates including the first five principal components  
436 and age. The model was adjusted for the same covariates except for sequencing batch  
437 for analysis of enterotype.

438

439 **Genetic correlation of gut microbiome and traits**

440 We used GCTA to perform a bivariate GREML analysis to estimate the genetic  
441 correlation between gut microbiome and traits in the GNHS<sup>27,37</sup>. The gut microbiome  
442 was divided into two groups according to the previous description. We used  
443 continuous variables to taxa present at more than ninety percent of participants and  
444 traits. For taxa present at fewer than ninety percent of participants, we used binary  
445 variables according to the absence/presence of taxa. This analysis included traits such  
446 as BMI, FBS, HbA1c, SBP, DBP, HDL-C, LDL-C, TC and TG.

447

448 **Constructing polygenic scores for taxa and alpha diversity**

449 We selected lead SNPs using PLINK v1.9 with the ‘—clump’ command to clump  
450 SNPs that  $p$  value  $< 5 \times 10^{-5}$  and  $r^2 < 0.1$  within 0.1 cM. We used beta coefficients as  
451 weight to construct polygenic scores for taxa and alpha diversity. For alpha diversity

---

452 and taxa present at more than ninety percent participants, we constructed weighted  
453 polygenic scores and performed the analysis on a general linear model with a negative  
454 binomial distribution to test for association between the polygenic scores and taxa,  
455 adjusted for the first five principal components, age, sex and sequencing batch. We  
456 used weighted polygenic scores and logistic regression to the absence/presence taxa,  
457 adjusted for the same covariates as in the above analysis. Taxa with significance  
458 ( $p < 0.05$ ) in the replication cohort were included for the further analysis.

459

#### 460 **The effective number of independent taxa**

461 As some taxa were correlated with each other, we used an eigendecomposition  
462 analysis to calculate the effective number of independent taxa on each taxonomy level  
463 <sup>35,36</sup>. Matrix  $M$  is an  $m \times n$  matrix, where  $m$  is the number of participants and  $n$  is the  
464 number of taxa on the corresponding taxa level. Matrix  $A$  is the variance-covariance  
465 matrix of matrix  $M$ .  $P$  is the matrix of eigenvectors.  $\text{diag}\{\lambda_1, \lambda_2, \dots, \lambda_n\}$  is the diagonal  
466 matrix comprised of the ordered eigenvalues, which can be calculated as:

$$\text{diag}\{\lambda_1, \lambda_2, \dots, \lambda_n\} = P^{-1}AP$$

467 The effective number of independent taxa can be calculated as:

$$\frac{(\sum_{i=1}^n \lambda_i)^2}{\sum_{i=1}^n \lambda_i^2}$$

468

#### 469 **Bi-directional MR analysis**

470 In the analysis of potential causal effect of gut microbiome features on diseases, we  
471 used independent genetic variants (selected as part of the polygenic score analysis) as

---

472 the instrument variables. In the analysis of potential causal effect of diseases on gut  
473 microbiome features, we selected genetic variants that were replicated in East Asian  
474 populations as instrument variables. As all instrument variables were from East Asian  
475 populations, we chose independent genetic variants ( $r^2 < 0.1$ ) based on GNHS cohort.  
476 We identified the best proxy ( $r^2 > 0.8$ ) based on GNHS cohort or discarded the variant  
477 if no proxy was available. We used inverse variance weighted (IVW) method to  
478 estimate effect size. To confirm the robustness of results, we performed other three  
479 MR methods including weighted median, MR-Egger and MR-PRESSO. To assess the  
480 presence of horizontal pleiotropy, we performed MR-PRESSO Global test and  
481 MR-Egger Regression. Effect sizes of gut microbiome on traits were dependent on  
482 units of traits<sup>43</sup> (Supplementary table S1). Results of human complex diseases on the  
483 absence/presence gut microbiome were presented as risk of presence (vs absence) of  
484 the microbiome per log odds difference of the disease. Results of diseases on other  
485 gut microbiome and alpha diversity were presented as changes in abundance of taxa  
486 (10-SD of log transformed) per log odds difference of the respective disease.  
487  
488 The statistical significance of gut microbiome on traits and diseases was defined as  
489  $p < 0.0008$  ( $0.05/62$ ). In addition, the statistical significance of diseases on gut  
490 microbiome features was defined as  $p < 0.05/n$  ( $n$  is the effective number of  
491 independent taxa on the corresponding taxonomy level). Results that could not pass  
492 Bonferroni adjustment but  $p < 0.05$  in all four MR methods were considered as  
493 potential causal relationships. We performed MR analyses on R v3.5.3.

---

494

495 **Pathway analysis**

496 We used OTUs by QIIME and annotated the variation of functional genes with  
497 Phylogenetic Investigation of Communities by Reconstruction of Unobserved States  
498 (PICRUST) <sup>51</sup>. The pathways and diseases were annotated using KEGG <sup>75-77</sup>. We used  
499 Spearman's rank-order correlation to investigate association of predicted pathway or  
500 diseases abundance with taxa. In the heatmap, diseases were clustered with 'hcluster'  
501 function on R. To test whether non-normalized pathway or disease abundance was  
502 associated with each other, we used SPIEC-EASI to test the interaction relationship,  
503 and then used Cytoscape v3.7.2 to visualize the interaction network <sup>78,79</sup>.

504

505 **Construction of the microbiome risk score**

506 To construct a microbiome risk score for T2DM, we used a Spearman's rank-order  
507 correlation to select taxa with the absolute value of correlation coefficient higher than  
508 0.2. Score for each taxon abundance <5% quantile in our study was defined as 0. For  
509 those above 5%, score for each taxon showing negative association with T2DM was  
510 defined as 1; score for each taxon showing positive association with T2DM was  
511 defined as -1. We then summed up values from all taxa. We selected logistic  
512 regression model to estimate association of the MRS with T2DM risk, and linear  
513 model to estimate the association of the MRS with the continuous variables, adjusted  
514 for age, sex, dietary energy intake, alcohol intake and BMI at the time of sample  
515 collection.



516

517 **Clustering diseases**

518 The clustering analysis was carried out with ‘cluster’ and ‘factoextra’ for plot on R.

519 We performed PAM algorithm based on predicted abundance of diseases or average

520 relative abundance after Z-score normalization<sup>80</sup>. PAM algorithm searches k medoids

521 among the observations and then found nearest medoids to minimize the dissimilarity

522 among clusters<sup>18</sup>. Given a set of objects  $x = (x_1, x_2, \dots, x_n)$ , the dissimilarity between

523 objects  $x_i$  and  $x_j$  is denoted by  $d(i,j)$ . The assignment of object i to the

524 representative object j is denoted by  $z_{ij}$ .  $z_{ij}$  is a binary variable and is 1 if object i

525 belongs to the cluster of the representative object j. The function to minimize the

526 model is given by:

$$\sum_{i=1}^n \sum_{j=1}^n d(i,j)z_{ij}$$

527

528 To identify the optimal cluster number, we used ‘pamk’ function in R to determine the

529 optimum average silhouette width. For each object i, we defined  $N_i$  as the average

530 dissimilarity between object i and all other objects within its cluster. For the

531 remaining clusters,  $b(i,w)$  represents the average dissimilarity between i and all

532 objects in cluster w. The minimum dissimilarity  $M_i$  can be calculated by:

$$M_i = \min \forall w (b(i,w)).$$

534 The silhouette width for object i can be calculated by:

$$sw_i = \frac{M_i - N_i}{\max(M_i, N_i)}$$

535 Then we calculated the average of silhouette width for each object. The cluster

---

536 number is determined by the number of which the average silhouette width is  
537 maximum.

538

### 539 **Acknowledgments**

540 This study was funded by National Natural Science Foundation of China (81903316,  
541 81773416), Westlake University (101396021801) and the 5010 Program for Clinical  
542 Researches (2007032) of the Sun Yat-sen University (Guangzhou, China). The  
543 authors declare no conflict of interest. We thank the Westlake University  
544 Supercomputer Center for providing computing and data analysis service for the  
545 present project.

546

### 547 **Data availability**

548 The raw data for 16 S rRNA gene sequences are available in the CNSA  
549 (<https://db.cngb.org/cnsa/>) of CNGBdb at accession number CNP0000829.

550

551

552

### 553 **References**

- 554 1. Awany, D. *et al.* Host and Microbiome Genome-Wide Association Studies:  
555 Current State and Challenges. *Front Genet* **9**, 637 (2018).
- 556 2. Bull, M.J. & Plummer, N.T. Part 1: The Human Gut Microbiome in Health  
557 and Disease. *Integr Med (Encinitas)* **13**, 17-22 (2014).
- 558 3. Lynch, J.B. & Hsiao, E.Y. Microbiomes as sources of emergent host  
559 phenotypes. *Science* **365**, 1405 (2019).
- 560 4. Allegretti, J.R., Mullish, B.H., Kelly, C. & Fischer, M. The evolution of the  
561 use of faecal microbiota transplantation and emerging therapeutic indications.  
562 *The Lancet* **394**, 420-431 (2019).
- 563 5. Wong, S.H. & Yu, J. Gut microbiota in colorectal cancer: mechanisms of  
564 action and clinical applications. *Nature Reviews Gastroenterology &*  
565 *Hepatology* (2019).

- 
- 566 6. Davies, N.M., Holmes, M.V. & Davey Smith, G. Reading Mendelian  
567 randomisation studies: a guide, glossary, and checklist for clinicians. *BMJ* **362**,  
568 k601 (2018).
- 569 7. Turpin, W. *et al.* Association of host genome with intestinal microbial  
570 composition in a large healthy cohort. *Nat Genet* **48**, 1413-1417 (2016).
- 571 8. Wang, J. *et al.* Genome-wide association analysis identifies variation in  
572 vitamin D receptor and other host factors influencing the gut microbiota. *Nat*  
573 *Genet* **48**, 1396-1406 (2016).
- 574 9. Goodrich, J.K. *et al.* Human genetics shape the gut microbiome. *Cell* **159**,  
575 789-99 (2014).
- 576 10. Goodrich, J.K. *et al.* Genetic Determinants of the Gut Microbiome in UK  
577 Twins. *Cell Host Microbe* **19**, 731-43 (2016).
- 578 11. Ganesan, K., Chung, S.K., Vanamala, J. & Xu, B. Causal Relationship  
579 between Diet-Induced Gut Microbiota Changes and Diabetes: A Novel  
580 Strategy to Transplant *Faecalibacterium prausnitzii* in Preventing Diabetes. *Int*  
581 *J Mol Sci* **19**(2018).
- 582 12. He, Y. *et al.* Regional variation limits applications of healthy gut microbiome  
583 reference ranges and disease models. *Nat Med* **24**, 1532-1535 (2018).
- 584 13. Rothschild, D. *et al.* Environment dominates over host genetics in shaping  
585 human gut microbiota. *Nature* **555**, 210-215 (2018).
- 586 14. Duvallet, C., Gibbons, S.M., Gurry, T., Irizarry, R.A. & Alm, E.J.  
587 Meta-analysis of gut microbiome studies identifies disease-specific and shared  
588 responses. *Nature communications* **8**, 1784-1784 (2017).
- 589 15. Cheng, S. *et al.* Identifying psychiatric disorder-associated gut microbiota  
590 using microbiota-related gene set enrichment analysis. *Briefings in*  
591 *Bioinformatics* (2019).
- 592 16. Jackson, M.A. *et al.* Gut microbiota associations with common diseases and  
593 prescription medications in a population-based cohort. *Nature*  
594 *Communications* **9**, 2655 (2018).
- 595 17. Cao, Y. *et al.* Association of magnesium in serum and urine with carotid  
596 intima-media thickness and serum lipids in middle-aged and elderly Chinese: a  
597 community-based cross-sectional study. *European journal of nutrition*  
598 **55**(2015).
- 599 18. Kaufman, L. & Rousseeuw, P. Partitioning Around Medoids (Program PAM).  
600 68-125 (1990).
- 601 19. Sun, L.-L. *et al.* Associations between the dietary intake of antioxidant  
602 nutrients and the risk of hip fracture in elderly Chinese: A case-control study.  
603 *The British journal of nutrition* **112**, 1-9 (2014).
- 604 20. Purcell, S. *et al.* PLINK: a tool set for whole-genome association and  
605 population-based linkage analyses. *American journal of human genetics* **81**,  
606 559-575 (2007).
- 607 21. Das, S. *et al.* Next-generation genotype imputation service and methods.  
608 *Nature Genetics* **48**, 1284 (2016).
- 609 22. Clarke, L. *et al.* The international Genome sample resource (IGSR): A

- 
- 610 worldwide collection of genome variation incorporating the 1000 Genomes  
611 Project data. *Nucleic Acids Research* **45**, D854-D859 (2016).
- 612 23. Delaneau, O. *et al.* Integrating sequence and array data to create an improved  
613 1000 Genomes Project haplotype reference panel. *Nature Communications* **5**,  
614 3934 (2014).
- 615 24. Okada, Y. *et al.* Risk for ACPA-positive rheumatoid arthritis is driven by  
616 shared HLA amino acid polymorphisms in Asian and European populations.  
617 *Hum Mol Genet* **23**, 6916-26 (2014).
- 618 25. Pillai, N.E. *et al.* Predicting HLA alleles from high-resolution SNP data in  
619 three Southeast Asian populations. *Hum Mol Genet* **23**, 4443-51 (2014).
- 620 26. Jia, X. *et al.* Imputing Amino Acid Polymorphisms in Human Leukocyte  
621 Antigens. *PLOS ONE* **8**, e64683 (2013).
- 622 27. Yang, J., Lee, S.H., Goddard, M.E. & Visscher, P.M. GCTA: a tool for  
623 genome-wide complex trait analysis. *Am J Hum Genet* **88**, 76-82 (2011).
- 624 28. Yang, J., Zaitlen, N.A., Goddard, M.E., Visscher, P.M. & Price, A.L.  
625 Advantages and pitfalls in the application of mixed-model association  
626 methods. *Nat Genet* **46**, 100-6 (2014).
- 627 29. Arumugam, M. *et al.* Enterotypes of the human gut microbiome. *Nature* **473**,  
628 174-80 (2011).
- 629 30. Lee, S.H., Wray, N.R., Goddard, M.E. & Visscher, P.M. Estimating missing  
630 heritability for disease from genome-wide association studies. *Am J Hum*  
631 *Genet* **88**, 294-305 (2011).
- 632 31. Hua, X. *et al.* MicrobiomeGWAS: a tool for identifying host genetic variants  
633 associated with microbiome composition. *bioRxiv*, 031187 (2015).
- 634 32. Ruhlemann, M.C. *et al.* Application of the distance-based F test in an mGWAS  
635 investigating beta diversity of intestinal microbiota identifies variants in  
636 SLC9A8 (NHE8) and 3 other loci. *Gut Microbes* **9**, 68-75 (2018).
- 637 33. Bonder, M.J. *et al.* The effect of host genetics on the gut microbiome. *Nat*  
638 *Genet* **48**, 1407-1412 (2016).
- 639 34. Yang, J. *et al.* Common SNPs explain a large proportion of the heritability for  
640 human height. *Nature Genetics* **42**, 565 (2010).
- 641 35. Bretherton, C.S., Widmann, M., Dymnikov, V.P., Wallace, J.M. & Bladé, I.  
642 The Effective Number of Spatial Degrees of Freedom of a Time-Varying Field.  
643 *Journal of Climate* **12**, 1990-2009 (1999).
- 644 36. Wang, H. *et al.* Genotype-by-environment interactions inferred from genetic  
645 effects on phenotypic variability in the UK Biobank. *Science Advances* **5**,  
646 eaaw3538 (2019).
- 647 37. Lee, S.H., Yang, J., Goddard, M.E., Visscher, P.M. & Wray, N.R. Estimation of  
648 pleiotropy between complex diseases using single-nucleotide  
649 polymorphism-derived genomic relationships and restricted maximum  
650 likelihood. *Bioinformatics* **28**, 2540-2 (2012).
- 651 38. Sanna, S. *et al.* Causal relationships among the gut microbiome, short-chain  
652 fatty acids and metabolic diseases. *Nature Genetics* **51**, 600-605 (2019).
- 653 39. Verbanck, M., Chen, C.-Y., Neale, B. & Do, R. Detection of widespread

- 
- 654 horizontal pleiotropy in causal relationships inferred from Mendelian  
655 randomization between complex traits and diseases. *Nature Genetics* **50**,  
656 693-698 (2018).
- 657 40. Low, S.K. *et al.* Identification of six new genetic loci associated with atrial  
658 fibrillation in the Japanese population. *Nat Genet* **49**, 953-958 (2017).
- 659 41. Suzuki, K. *et al.* Identification of 28 new susceptibility loci for type 2 diabetes  
660 in the Japanese population. *Nat Genet* **51**, 379-386 (2019).
- 661 42. Akiyama, M. *et al.* Genome-wide association study identifies 112 new loci for  
662 body mass index in the Japanese population. *Nat Genet* **49**, 1458-1467 (2017).
- 663 43. Kanai, M. *et al.* Genetic analysis of quantitative traits in the Japanese  
664 population links cell types to complex human diseases. *Nat Genet* **50**, 390-400  
665 (2018).
- 666 44. Matoba, N. *et al.* GWAS of smoking behaviour in 165,436 Japanese people  
667 reveals seven new loci and shared genetic architecture. *Nat Hum Behav* **3**,  
668 471-477 (2019).
- 669 45. Lu, X.F. *et al.* Genome-wide association study in Han Chinese identifies four  
670 new susceptibility loci for coronary artery disease. *Nature Genetics* **44**, 890-+  
671 (2012).
- 672 46. Marzec, J. *et al.* A genetic study and meta-analysis of the genetic  
673 predisposition of prostate cancer in a Chinese population. *Oncotarget* **7**,  
674 21393-403 (2016).
- 675 47. Okada, Y. *et al.* Meta-analysis identifies multiple loci associated with kidney  
676 function-related traits in east Asian populations. *Nat Genet* **44**, 904-9 (2012).
- 677 48. Zeng, C. *et al.* Identification of Susceptibility Loci and Genes for Colorectal  
678 Cancer Risk. *Gastroenterology* **150**, 1633-1645 (2016).
- 679 49. Zhou, X. *et al.* Identification of genetic risk factors in the Chinese population  
680 implicates a role of immune system in Alzheimer's disease pathogenesis. *Proc*  
681 *Natl Acad Sci U S A* **115**, 1697-1706 (2018).
- 682 50. Foo, J.N. *et al.* Genome-wide association study of Parkinson's disease in East  
683 Asians. *Hum Mol Genet* **26**, 226-232 (2017).
- 684 51. Langille, M.G.I. *et al.* Predictive functional profiling of microbial  
685 communities using 16S rRNA marker gene sequences. *Nature Biotechnology*  
686 **31**, 814 (2013).
- 687 52. Canga, Y. *et al.* Assessment of Atrial Conduction Times in Patients with  
688 Newly Diagnosed Parkinson's Disease. *Parkinsons Dis* **2018**, 2916905 (2018).
- 689 53. Ihara, M. & Washida, K. Linking Atrial Fibrillation with Alzheimer's Disease:  
690 Epidemiological, Pathological, and Mechanistic Evidence. *J Alzheimers Dis*  
691 **62**, 61-72 (2018).
- 692 54. Conen, D. *et al.* Risk of Malignant Cancer Among Women With New-Onset  
693 Atrial FibrillationAtrial Fibrillation and Risk of CancerAtrial Fibrillation and  
694 Risk of Cancer. *JAMA Cardiology* **1**, 389-396 (2016).
- 695 55. Rousseeuw, P.J. Silhouettes: A graphical aid to the interpretation and  
696 validation of cluster analysis. *Journal of Computational and Applied*  
697 *Mathematics* **20**, 53-65 (1987).

- 
- 698 56. Hu, F.B. *et al.* Prospective Study of Cataract Extraction and Risk of Coronary  
699 Heart Disease in Women. *American Journal of Epidemiology* **153**, 875-881  
700 (2001).
- 701 57. Javaheri, S. & Redline, S. Insomnia and Risk of Cardiovascular Disease. *Chest*  
702 **152**, 435-444 (2017).
- 703 58. Strand, L.B. *et al.* Self-reported sleep duration and coronary heart disease  
704 mortality: A large cohort study of 400,000 Taiwanese adults. *International*  
705 *Journal of Cardiology* **207**, 246-251 (2016).
- 706 59. Blekhan, R. *et al.* Host genetic variation impacts microbiome composition  
707 across human body sites. *Genome Biol* **16**, 191 (2015).
- 708 60. Cirulli, E.T. & Goldstein, D.B. Uncovering the roles of rare variants in  
709 common disease through whole-genome sequencing. *Nat Rev Genet* **11**,  
710 415-25 (2010).
- 711 61. Vinter, N., Christesen Amanda, M.S., Fenger-Grøn, M., Tjønneland, A. &  
712 Frost, L. Atrial Fibrillation and Risk of Cancer: A Danish Population-Based  
713 Cohort Study. *Journal of the American Heart Association* **7**, e009543 (2018).
- 714 62. Zoja, C. *et al.* Imatinib ameliorates renal disease and survival in murine lupus  
715 autoimmune disease. *Kidney International* **70**, 97-103 (2006).
- 716 63. Boursi, B., Mamtani, R., Haynes, K. & Yang, Y.-X. Parkinson's disease and  
717 colorectal cancer risk-A nested case control study. *Cancer epidemiology* **43**,  
718 9-14 (2016).
- 719 64. Xie, X., Luo, X. & Xie, M. Association between Parkinson's disease and risk  
720 of colorectal cancer. *Parkinsonism & Related Disorders* **35**, 42-47 (2017).
- 721 65. van Rheenen, W. *et al.* Genome-wide association analyses identify new risk  
722 variants and the genetic architecture of amyotrophic lateral sclerosis. *Nat*  
723 *Genet* **48**, 1043-8 (2016).
- 724 66. Lambert, J.C. *et al.* Meta-analysis of 74,046 individuals identifies 11 new  
725 susceptibility loci for Alzheimer's disease. *Nat Genet* **45**, 1452-8 (2013).
- 726 67. Pankratz, N. *et al.* Meta-analysis of Parkinson's disease: identification of a  
727 novel locus, RIT2. *Annals of neurology* **71**, 370-384 (2012).
- 728 68. Anderson, C.A. *et al.* Data quality control in genetic case-control association  
729 studies. *Nat Protoc* **5**, 1564-73 (2010).
- 730 69. Delaneau, O., Marchini, J. & Zagury, J.-F. A linear complexity phasing method  
731 for thousands of genomes. *Nature Methods* **9**, 179 (2011).
- 732 70. Edgar, R.C. Search and clustering orders of magnitude faster than BLAST.  
733 *Bioinformatics* **26**, 2460-2461 (2010).
- 734 71. Edgar, R.C. UPARSE: highly accurate OTU sequences from microbial  
735 amplicon reads. *Nat Methods* **10**, 996-8 (2013).
- 736 72. Caporaso, J.G. *et al.* QIIME allows analysis of high-throughput community  
737 sequencing data. *Nat Methods* **7**, 335-6 (2010).
- 738 73. Caliński, T. & Harabasz, J. A dendrite method for cluster analysis.  
739 *Communications in Statistics* **3**, 1-27 (1974).
- 740 74. Bulik-Sullivan, B.K. *et al.* LD Score regression distinguishes confounding  
741 from polygenicity in genome-wide association studies. *Nature Genetics* **47**,

- 
- 742 291-295 (2015).  
743 75. Kanehisa, M. & Goto, S. KEGG: kyoto encyclopedia of genes and genomes.  
744 *Nucleic Acids Res* **28**, 27-30 (2000).  
745 76. Kanehisa, M., Sato, Y., Furumichi, M., Morishima, K. & Tanabe, M. New  
746 approach for understanding genome variations in KEGG. *Nucleic Acids Res*  
747 **47**, D590-D595 (2019).  
748 77. Kanehisa, M. Toward understanding the origin and evolution of cellular  
749 organisms. *Protein Sci* (2019).  
750 78. Shannon, P. *et al.* Cytoscape: a software environment for integrated models of  
751 biomolecular interaction networks. *Genome research* **13**, 2498-2504 (2003).  
752 79. Kurtz, Z.D. *et al.* Sparse and Compositionally Robust Inference of Microbial  
753 Ecological Networks. *PLOS Computational Biology* **11**, e1004226 (2015).  
754 80. Reynolds, A.P., Richards, G., de la Iglesia, B. & Rayward-Smith, V.J.  
755 Clustering Rules: A Comparison of Partitioning and Hierarchical Clustering  
756 Algorithms. *Journal of Mathematical Modelling and Algorithms* **5**, 475-504  
757 (2006).  
758

---

759 **Figure legends**

760 **Figure 1 Association of host polygenic score with gut microbiome.** The participants  
761 were divided into high and low polygenic score group according to median levels of  
762 the polygenic score. The dots on the right of the box represent the distribution of  
763 polygenic score. The dash line in the box is the position of median line and the solid  
764 line is the position of mean line. The length of box depends on upper quartile and  
765 lower quartile of datum. Sample size at the discovery stage is 1475, and that at  
766 replication stage is 199. **(A).** Correlation of *Coriobacteriaceae* abundance with the  
767 polygenic score (including 45 lead SNPs, Supplementary Table S8). **(B).** Correlation  
768 of undefined species belonging to *Parabacteroides* genus  
769 (*Parabacteroides\_undefined*) with the polygenic score (including 32 lead SNPs,  
770 Supplementary Table S8). **(C).** Correlation of *Odoribacter* presence with the  
771 polygenic score (including 43 lead SNPs, Supplementary Table S8).

772

773 **Figure 2 Effect of host genetically predicted higher atrial fibrillation risk on gut**  
774 **microbiome. (A).** Causal association of atrial fibrillation with abundance of  
775 *Burkholderiales*, *Alcaligenaceae*, *Lachnobacterium* and *Coprophilus*. The effect sizes  
776 of atrial fibrillation on taxa are changes in abundance of bacteria (10-SD of  
777 log-transformed) per genetically determined higher log odds of atrial fibrillation. **(B).**  
778 Causal association of atrial fibrillation with presence of *Barnesiellaceae*,  
779 *Veillonellaceae\_undefined* and *Mitsuokella*. The effect size of atrial fibrillation on  
780 taxa are present as odds ratio increase in log odds of atrial fibrillation. **(C).** The heat  
781 map shows correlation of AF-associated taxa with predicted diseases. The grey  
782 components show no significance of correlation with Bonferroni correction ( $p > 0.05 /$   
783  $(5.6 * 22)$ ,  $p > 0.0004$ ).

784

785 **Figure 3 Association and cluster of diseases predicted by the gut microbiome. (A).**  
786 Plot of clusters in Guangzhou Nutrition and Health Study (GNHS) cohort (n=1919).  
787 **(B).** Plot of cluster results in the replication cohort (n=217). **(C).** Plot of 5 clusters in  
788 antibiotic-taking participants (n=18). The optimal cluster is 5 in GNHS cohort and 6  
789 in the replication. The clusters share consistent components between two studies. In  
790 contrast, components are different between antibiotic-taking participants and control  
791 groups. Dimension1 (Dim1) and dimension2 (Dim2) can explain 40.1% and 13.1%  
792 variance, respectively in GNHS cohort. The annotation for variables is as following.  
793 AT: African trypanosomiasis, AD: Alzheimer's disease, V1: Amoebiasis, ALS:  
794 Amyotrophic lateral sclerosis, BC: Bladder cancer, CD: Chagas disease, CML:  
795 Chronic myeloid leukemia, CRC: Colorectal cancer, V2: Hepatitis C, HD:  
796 Huntington's disease, HCM: Hypertrophic cardiomyopathy, V3: Influenza A, PD:  
797 Parkinson's disease, V4: Pathways in cancer, V5: Prion disease, PCa: Prostate cancer,  
798 RCC: Renal cell carcinoma, SLE: Systemic lupus erythematosus, V6: Tuberculosis,  
799 T1DM: Type I diabetes mellitus, T2DM: Type II diabetes mellitus, V7: Vibrio  
800 cholerae infection. **(D).** Plot of clusters in GNHS patients. Patients get only one of the  
801 follow diseases: stroke (n=8), chronic hepatitis (n=19), coronary heart diseases (n=40),



---

802 cataract (n=124) and insomnia (n=68). **(E)**. Gut microbiome-predicted network of  
803 relationship among different human complex diseases. The interaction is determined  
804 by SPIEC-EASI with non-normalized predicted abundance data.

805

806 **Figure 4 Correlation of the human complex diseases with gut microbiome on**  
807 **genus level.** The heat map shows correlation of predicted diseases and gut  
808 microbiome on genus level. The grey components show no significance of correlation  
809 with Bonferroni correction ( $p > 0.05 / (5.6 * 22)$ ,  $p > 0.0004$ ).

810

811

812 **Figure 1 Association of host polygenic score with gut microbiome.** The participants  
813 were divided into high and low polygenic score group according to median levels of  
814 the polygenic score. The dots on the right of the box represent the distribution of  
815 polygenic score. The dash line in the box is the position of median line and the solid  
816 line is the position of mean line. The length of box depends on upper quartile and  
817 lower quartile of datum. Sample size at the discovery stage is 1475, and that at  
818 replication stage is 199. **(A).** Correlation of *Coriobacteriaceae* abundance with the  
819 polygenic score (including 45 lead SNPs, Supplementary Table S8). **(B).** Correlation  
820 of undefined species belonging to *Parabacteroides* genus  
821 (*Parabacteroides\_undefined*) with the polygenic score (including 32 lead SNPs,  
822 Supplementary Table S8). **(C).** Correlation of *Odoribacter* presence with the  
823 polygenic score (including 43 lead SNPs, Supplementary Table S8).

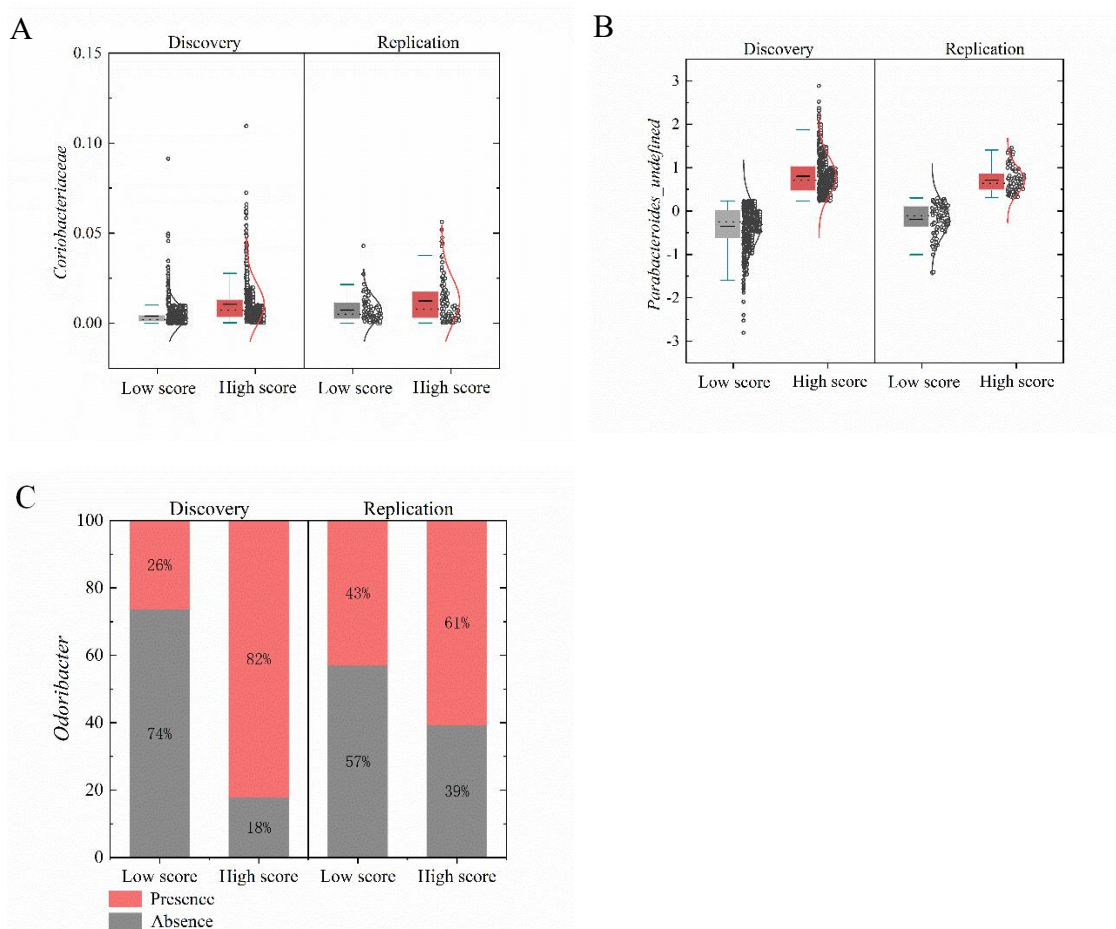

824

825

826 **Figure 2 Effect of host genetically predicted higher atrial fibrillation risk on gut**  
 827 **microbiome. (A).** Causal association of atrial fibrillation with abundance of  
 828 *Burkholderiales*, *Alcaligenaceae*, *Lachnobacterium* and *Coprophilus*. The effect sizes  
 829 of atrial fibrillation on taxa are changes in abundance of bacteria (10-SD of  
 830 log-transformed) per genetically determined higher log odds of atrial fibrillation. **(B).**  
 831 Causal association of atrial fibrillation with presence of *Barnesiellaceae*,  
 832 *Veillonellaceae\_undefined* and *Mitsuokella*. The effect size of atrial fibrillation on  
 833 taxa are present as odds ratio increase in log odds of atrial fibrillation. **(C).** The heat  
 834 map shows correlation of AF-associated taxa with predicted diseases. The grey  
 835 components show no significance of correlation with Bonferroni correction ( $p > 0.05 /$   
 836  $(5.6 * 22)$ ,  $p > 0.0004$ ).  
 837

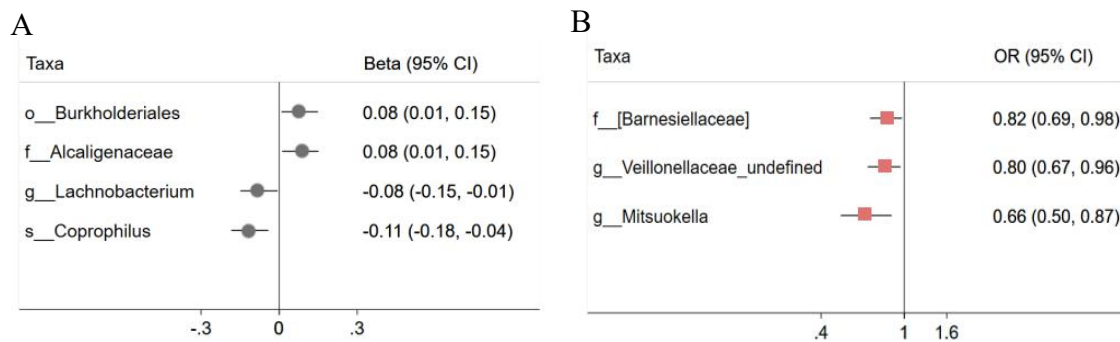

838 C

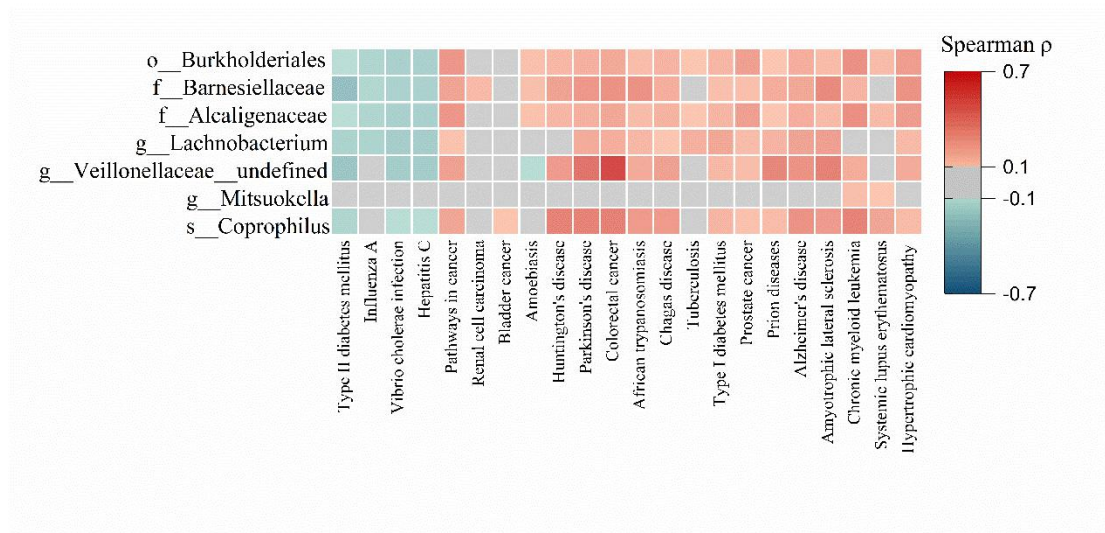

839

840 **Figure 3 Association and cluster of diseases predicted by the gut microbiome. (A).**  
 841 Plot of clusters in Guangzhou Nutrition and Health Study (GNHS) cohort (n=1919).  
 842 **(B).** Plot of cluster results in the replication cohort (n=217). **(C).** Plot of 5 clusters in  
 843 antibiotic-taking participants (n=18). The optimal cluster is 5 in GNHS cohort and 6  
 844 in the replication. The clusters share consistent components between two studies. In  
 845 contrast, components are different between antibiotic-taking participants and control  
 846 groups. Dimension1 (Dim1) and dimension2 (Dim2) can explain 40.1% and 13.1%  
 847 variance, respectively in GNHS cohort. The annotation for variables is as following.  
 848 AT: African trypanosomiasis, AD: Alzheimer's disease, V1: Amoebiasis, ALS:  
 849 Amyotrophic lateral sclerosis, BC: Bladder cancer, CD: Chagas disease, CML:  
 850 Chronic myeloid leukemia, CRC: Colorectal cancer, V2: Hepatitis C, HD:  
 851 Huntington's disease, HCM: Hypertrophic cardiomyopathy, V3: Influenza A, PD:  
 852 Parkinson's disease, V4: Pathways in cancer, V5: Prion disease, PCa: Prostate cancer,  
 853 RCC: Renal cell carcinoma, SLE: Systemic lupus erythematosus, V6: Tuberculosis,  
 854 T1DM: Type I diabetes mellitus, T2DM: Type II diabetes mellitus, V7: Vibrio  
 855 cholerae infection. **(D).** Plot of clusters in GNHS patients. Patients get only one of the  
 856 follow diseases: stroke (n=8), chronic hepatitis (n=19), coronary heart diseases (n=40),  
 857 cataract (n=124) and insomnia (n=68). **(E).** Gut microbiome-predicted network of  
 858 relationship among different human complex diseases. The interaction is determined  
 859 by SPIEC-EASI with non-normalized predicted abundance data.

860  
861

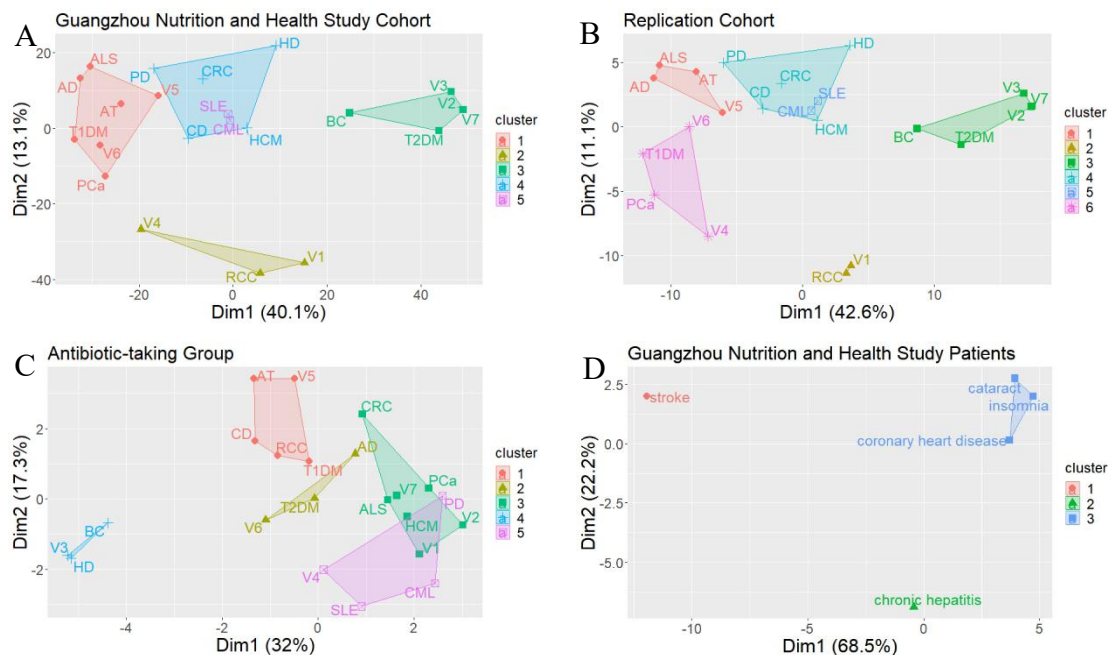

E

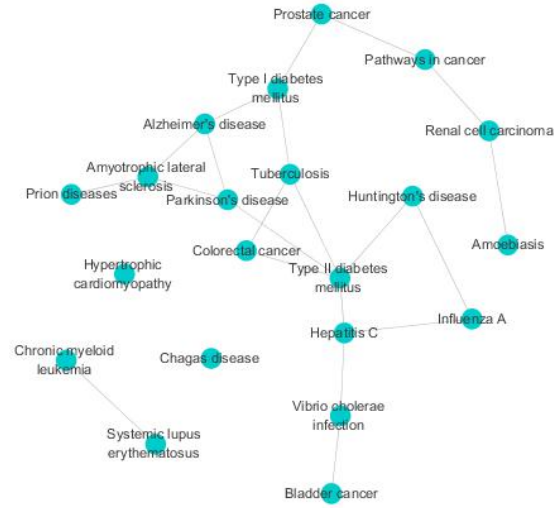

862

863

864 **Figure 4 Correlation of the human complex diseases with gut microbiome.** The  
 865 heat map shows correlation of predicted diseases and gut microbiome on genus level.  
 866 The grey components show no significance of correlation with Bonferroni correction  
 867 ( $p > 0.05 / (5.6 * 22)$ ,  $p > 0.0004$ ).

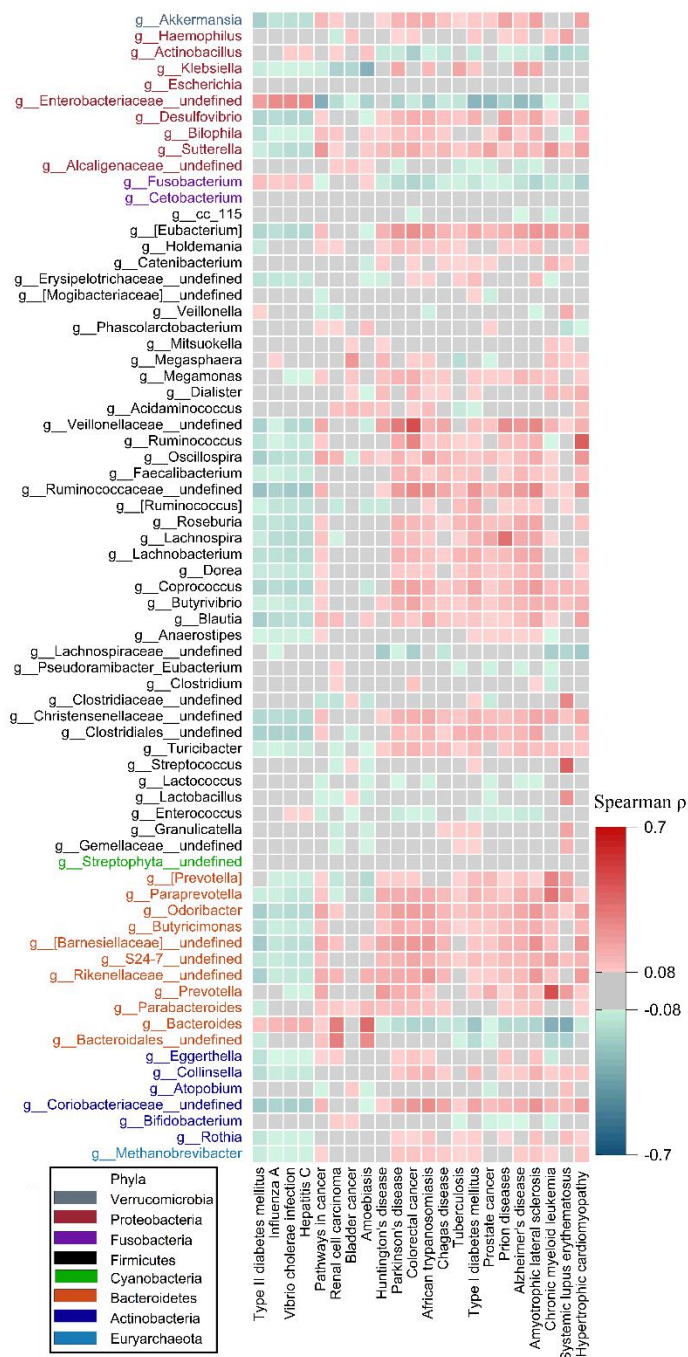

Source: https://www.biorxiv.org/content/10.1101/2019.12.26.888313v1.full.pdf
